# Supplementary material for: Comparison of the oxygen isotope signatures in speleothem records and iHadCM3 model simulations for the last millennium
Source: Copernicus journal article supplement (doi:10.5194/cp-2020-121), 2020-09-29
Supplement: Supplementary file [file cp-2020-121-AC2-supplement.pdf]

# Reply to the reviewers' comments: Comparison of the oxygen isotope signatures in speleothem records and iHadCM3 model simulations for the last millennium (cp-2019-121)

Janica C. Bühler, Carla Roesch, Moritz Kirschner, Louise Sime, Max D. Holloway, Kira Rehfeld

December 16, 2020

## Summary of changes

We thank Jens Fohlmeister for his constructive comments and detailed reading. In response to his suggestions we plan to

- enhance the discussion especially including evaporation and resulting changes in the isotopic signatures of infiltrating water,
- carefully revise the method section and improve those sections, where precipitation weighted  $\delta^{18}O$  is used and improve the explanation of the karst filter
- explore different choices for the karst-filtering analysis (reversed order of filtering and temporal degradation),
- revise the text throughout the manuscript to clarify statements,
- and fix formatting where necessary.

A detailed response to the helpful remarks of the referee is given below.

## 1 Reply to the second reviewer

(Original report cited in italics)

*The authors analysed a climate model simulation covering the last  $\sim 1000$  years mainly with respect to  $T$ ,  $prcp$ , and  $d18O$  of  $prcp$ . They compared those values with speleothem data, obtained from a recently published data base. They compared the mean, variance, spectral characteristics, correlation pattern of speleothem data and model results on a global scale.*

*This project is a very ambitious one. To my opinion, the authors predominantly did a really good job. I appreciate the approach of analyzing the data on different aspects and with many, partly sophisticated, methods. The results that the speleothem and model data seem to do not fit too nicely is very interesting, as it points to the need to further improve both - the performance of climate models and the understanding of proxy data from speleothems. A very first step was already applied in this study: I like a lot that the authors tried to translate the temporal high resolution data of the model results into a speleothem-typical time series (accounting for water residence time in soil and karst, applying speleothem sampling resolution and T-dependent  $\text{HCO}_3^- \rightarrow \text{CaCO}_3$  fractionation of stable oxygen isotopes). Nevertheless, I think it is possible to do it even better than that.*

*We thank the reviewer for this positive assessment.*

*For example, and this is my largest point of critics: I am really not sure, if it is the mean annual d18O of precipitation, what speleothem are recording, but what seems to be used here from the model output. Isn't it rather the case that speleothems record the amount weighted d18O values of precipitation? Or in some locations, especially in more arid regions, with low amount of precipitation but elevated T, speleothem d18O reflect more likely the amount weighted d18O of infiltrated water. Thus, evaporation processes are important but not considered here. However, to my understanding climate models do provide those variables. They should have evaporation processes on land included. Wouldn't it be an option to try this variable for analysis? If I remember correctly, Wackerbarth et al., (2012, CP) did such an approach.*

*Especially, as the models should even account for evaporation-dependent fractionation processes of oxygen isotopes during evaporation, comparing the speleothem results with those of the models should potentially result in better agreement. The d18O values of the remaining, the non-evaporated water, which is finally entering the deeper soil layers and the karst system, would be known from the model. I guess this would be the easiest way (without any need to use cave-site specific insights from cave monitoring studies) to better compare model results and speleothem d18O values in a more comprehensive way. At this point, I don't ask to redo all the analysis with an infiltration weighted mean d18O instead of an annual mean d18O of precipitation, but it would be appropriate to at least include this possibility in the discussion section (e.g. Sec. 5.4) – and try this in a potential follow-up study.*

*To my understanding, those evaporation processes could very well explain, why the d18O model data of precipitation tend to underestimate the speleothem-recorded d18O values in warm and more arid regions (see your Figs. 3d and 4d). In those regions, evaporation is very important and influences both – the amount of infiltrating water per month and the evaporation-dependent d18O enrichment of the non-evaporated water. I think that if one would account for that, it would potentially improve your model-data comparison. At least when comparing the mean values of the last 1000 a. But it has maybe even the potential to increase the average variability of the modeled d18O values, compared to your approach*

*using rain water. And it maybe even brings some additional variance on the longer scales into the data. The reason for that could be that d18O of infiltrating water would - in addition to changes in the d18O of precipitation – potentially show a large change due to temperature effects on the amount of evaporation and the d18O of the remaining infiltrating water.*

We agree with the reviewer, that the precipitation  $\delta^{18}O$  signature that effectively gets transmitted to the karst system and the drip sites is dependent on the precipitation amounts. For that reason, we do account for precipitation amount impacts on the signal, by using precipitation-weighted  $\delta^{18}O$  values. In most regions there is a good degree of correlation between precipitation-weighted, and unweighted  $\delta^{18}O$ . We did, however, not make that very clear in the methods. We will rectify this in the revised version.

We also agree on the benefits of using simulated infiltrating water amounts instead of the annual mean of precipitation. To calculate the infiltration rates the proportion of evaporation is needed for calculation. Evaporation processes are of course considered in HadCM3. Due to storage limitations, however, only selected variables were stored during the simulation. This did not include evaporation and all land model variables except for vegetation fractions. Obtaining evaporation could be possible by rerunning the model, or by estimating it through heuristic approaches as in Thornthwaite and Mather (1957) by considering the latent heat flux from the surface. However this would also introduce additional uncertainty into the analysis. In essence, we agree that we could better discuss the potential effects of evaporation changes on the speleothem records. In the minor comments the reviewer points out several occasions, where evaporation might help in the interpretation of the results. Therefore, we will check for the potential effects of evaporation in the results and add further discussion in the revision. The suggested analysis will also be taken into account for a follow-up project where we include a multi-model data comparison and have access to evaporation output from several simulations and we can cross-compare approaches to estimate evapotranspirative contributions.

*Otherwise, I have only comments of more minor attitude. Please find them listed below (with some repeatedly occurring instances, where I address the advantages of accounting for evaporation and amount weighted means).*

*To sum up, I would really like to see this work published pending on an improved manuscript version, where my major concern is accounted for (in which way the authors feel more comfortable with) and the smaller issues from below are considered/discussed.*

*Best wishes, Jens Fohlmeister*

### **Detailed Comments**

*L 18: “proxy-based variability of d18O”: d18O is a proxy. Thus your phrasing sounds a bit weird. In the context of the text you might mean ‘archive-based’?*

Thank you for spotting this. We will adjust it with your suggestion.

L19-20: You might should add, that most of the difference on the side of the ‘short-term variability’ ( $\sim 20a$ ) comes from smoothing due to soil water residence time and resolution. You showed quite nicely that on the long frequencies, both types of data sets do not agree – whatever you tried.

Thank you for this specification. We adjusted the section as follows: ‘...Most of this difference can likely be attributed to the records’ lower temporal resolution and averaging or smoothing processes affecting the  $\delta^{18}O$  signal e.g. through soil water residence times. ...’

L 64: a space is need after ‘system’

Done.

L65: I would be more specific here and state that ‘The ratio of H218O to H216O in precipitation is an indicator of evaporation temperature, . . .’ as it is possible to determine the d18O values in other reservoirs as well. And there other effects are also important.

Thanks for this clarification. We will adjust the sentence using your suggestion.

L83: ‘. . . hampered by non-linear growth processes (Dreybrodt 1980).’ Is Dreybrodt 1980 the correct reference, as he focussed only on precipitation of  $CaCO_3$ ? Not on d18O variations. Maybe use one of his later studies, e.g., Dreybrodt and Scholz, 2011 or Dreybrodt and Romanov, 2016.

Thank you for this correction. We will clarify and refer to Dreybrodt and Scholz (2011) instead.

L85: ‘. . .as well as dating uncertainties’. Please explain, how dating uncertainties shall have an influence on the interpretation of d18O as you state here.

”... The climatic interpretation of speleothem  $\delta^{18}O$  variations in calcite or aragonite (hereafter  $\delta^{18}O_{speleo}$ ) can be hampered by non-linear growth processes (Dreybrodt and Scholz, 2011), and multiple cave-specific parameters such as vegetation cover (Haude, 1954; Wackerbarth et al., 2010), karst (Jean-Baptiste et al., 2019), and inner cave processes (Fairchild et al., 2006), which influence  $\delta^{18}O_{speleo}$ . Especially in the comparison between  $\delta^{18}O_{speleo}$  of different speleothems, dating uncertainties complicate the assessment of climatic drivers, as they increase the uncertainty in pairwise comparisons and similarity estimates (Breitenbach et al., 2012; Rehfeld and Kurths, 2014). ...”

L88: Please correct brackets around the reference in this line.

Done.

L116: '*. . .freshwater hydrological cycle in the model shows only a slight overestimation in the local evaporation (Pardaens et al., 2003).*' According to this statement, there is some evaporation included in the model. So it should be feasible to work with those data, instead to precipitation only (both amount and isotopic signature).

See major comment section.

L130: '*Vegetation above the cave has an impact on the source water . . .*'. This reads a bit strange. Really on source water? Or rather on the amount of soil water and its  $d18O$ , which is coming from some source with a certain isotopic composition? Alternatively, you could write something like: *Vegetation above the cave can alter the amount of infiltrating water and its isotopic signature.*

Thanks for the clarification here. We will use the last sentence that you suggested in the revised version.

L130-131: Here you already state, what potentially can have some strong effect. Thus, I wonder a bit, why you do not have accounted for that stuff in your analysis.

See major comment section.

L134-135: This sentence should be changed, as it is not completely correct, if you mean with 'surface' the atmosphere. In addition, the  $CO_2$  and  $Ca^{2+}$  charging processes should be mentioned to make this better understandable for the reader. Please consider to rephrase to something like that: '*Infiltrating surface water is charged with soil gas  $CO_2$ , which concentration is about 1-2 magnitudes larger than that of the atmosphere and enables the carbonic acid driven  $CaCO_3$  dissolution of the host rock. The generally lower partial  $pCO_2$  pressure conditions in the cave environment compared to that of the soil and epikarst makes the drip water degas ...*'

Thank you for this suggestion, which greatly improves readability. We will change the section, following your suggestion to:

**Infiltrating surface water is charged with soil gas  $CO_2$ , where the partial  $CO_2$  pressure is larger than in the atmosphere, facilitating the carbonic acid driven  $CaCO_3$  dissolution of the host rock. The generally lower partial  $pCO_2$  pressure conditions in the cave environment compared to that of the soil and**

**epikarst makes the drip water degas** and precipitate calcite in a fractionation process, which consequently forms a speleothem (Tremaine et al., 2011).

*L138-139: This sounds very dramatic. Not from the wording, but from the implications. As it is written here, I hope this to be not true. Otherwise, nobody should trust such speleothem d18O reconstructions.*

We changed the section as follows:

”... During the calcification process, interactions with the cave environment or water inclusions within the mineral are still possible and, therefore, may further change the  $\delta^{18}O_{speleo}$  archived in the speleothem. ...”

*L180: samples instead of sampled*  
Done. Thanks.

*L202-203: Have you performed this averaging also for d18O in precipitation? From my understanding, of this sentence you do. But I think it would be better to use an amount weighted mean of d18O in precipitation? This is closer to the value really infiltrating into the soil/karst.*

We use precipitation weighted  $\delta^{18}O$  throughout this analysis. We will make that more clear and changed the section as follows:

”...Temperature, precipitation, and isotopic data are extracted from the simulation at cave locations by bi-linear interpolation. Annual mean values for temperature, precipitation **and isotopic composition of precipitation** are formed by averaging over all months from April onwards to March of the following year. **This is also the time span for which precipitation weighted  $\delta^{18}O$  ( $\delta^{18}O_{pw}$ ) values are calculated.** ...”

*Based on that, what about evapotranspiration and changes of this during the modeled 1000 years? Have you accounted for that?*

*Maybe, I am wrong, but my understanding of those isotope enabled GCMs was, that they have at least an 'evaporation on land' module. This should also account for fractionation effects on the evaporated water, but also for the remaining water, what you are interested in. Would it be an option to use those d18O values instead of that of precipitation (again weighted by the amount of infiltration)? Maybe not for this manuscript, but in any future application.*

See major comment section.

L219-221: Here you use the first time  $d18O_{pw}$ . It is not explained here nor somewhere else. What is this?

Thanks for noticing. It stands for precipitation weighted  $\delta^{18}O$ . We will explain it in the section starting L200, also following your remark to L202-203.

In addition, I am sorry, but I do not understand exactly, why you are doing this Greens function approach? I get pretty ugly results in terms of mass balance with this, if tau is small (e.g., 1, 2, 3 years). For example using a tau of 1 year: even after 100 years waiting time, only 58 percent reached the cave. For tau=3 that are 84 %, what reached the cave after 100 years. For larger tau it works better, I admit. But as you use this filter with a residence time of 3 years, I would be happy if you please could explain why you used this way of residence time description. Have you normalized this somehow?

Following Dee et al. (2015), we use a normalization such that  $\int_0^{T_{Send}} g(t)dt = 1$ , where  $g(t) = 1/\tau \cdot e^{-t/\tau}$  as in the manuscript. Thank you for spotting that we did not mention this in the method section. We will add this in the revised manuscript.

L228-229: Is it possible to rephrase this sentence? I regret to not being able to understand, what you mean by this.

Thanks for pointing this out. This was also a comment by the first referee. We only choose the highest correlation estimate from significant cross-correlation estimates. If the cross-correlation between two speleothems using a specific pair of age-models is not significant at the 10% level, it is not chosen as a ‘best fit’. We will clarify this in the manuscript at the respective section.

Sec 3.2 and 3.3: Please explicitly state the number of used/available records for those approaches as those are most likely less, than that number mentioned in line 180.

This is indeed a valuable information that is missing. There are three groups of speleothems that we analyze, each with more strict selection criteria depending on the analysis. We will add this to each analysis step in the results section.

L249: ‘Generally, modeled values appear to be more depleted overall than the mean values of speleothem  $_{18}O_{dw}$ . . .’. Wouldn’t this be a hint, that evaporation is important and should be accounted for (at least in any potential follow up study)?

See major comment section.

L269: ‘offsets also show a strong influence of temperature (Fig. 4d)’ Only to repeat my

statements above: At warmer climates there is more evaporation, which lead to enhanced  $d18O$  values of the remaining water compared to that of precipitation. The remaining water soaks finally into the soil and cave. Thus, it would be worth to check if soil water  $d18O$  works better than precipitation.

See major comment section.

But this will most likely not solve the offset at colder  $T$  in the northern Hemisphere. But there, maybe it will work when using the amount weighted  $d18O$  of precipitation (or even better with infiltrating water) instead of annual mean  $d18O$ . As you brought up the example from Bunker cave. For this cave system and this region it was shown, that summer precipitation barely contributes to infiltrating water (most is gone by evaporation and transpiration), which is able to reach the cave (Riechermann et al., 2011; Wackerbarth et al., 2010). As summer rain is more enriched in  $d18O$  compared to winter precipitation, this would shift the infiltrating water isotopic composition towards lighter values compared with the heavier annual mean  $d18O$  of precipitation. And would thus potentially bring the model results closer to the observed speleothem values.

We do use precipitation weighted  $d18O$  throughout the analysis. However, this was not clearly stated in the methods section, which we will rectify in a revised version. As for the evaporation and infiltrated water, I refer to the major comments above.

L298-279: I am sorry but I am confused again. You are writing: 'The global distribution of variance ratios between  $d18O_{dw.eq}$  and  $d18O$  (Fig. 5a) shows overall higher variability in the speleothem records than in the simulation'. I agree with this observation, but this is somehow in contrast to Fig 5 b and c, where the variance ratio between  $d18O_{dw.eq}$  and  $d18O$  is smaller than one. Is it possible that in Fig 5a you are showing the variance ratio of  $d18O_{dw.eq}$  and the already down sampled  $d18O$  of the model simulation?

You are correct. Fig 5a shows the global distribution where the simulation is already down-sampled to model resolution. We will clarify this in the stated line as follows:

"... The global distribution of variance ratios between  $\delta^{18}O_{dw.eq}$  and **down-sampled**  $\delta^{18}O$  (Fig. 5a) shows overall higher variability in the speleothem records than in the simulation, with local exceptions. ..."

We also updated the caption of figure 5 to prevent further confusion:

"(a) Spatial visualization of the site-based dimensionless variance ratio  $V_{Rec}/V_{Sim}$ , **where the simulated  $\delta^{18}O$  is down-sampled to record resolution**, based on LM1. ..."



L288: *I think the reference to Fig 5 is not correct, as this figure does not give a hint on a 'smoothed model pattern'.*

Thanks for spotting this. The expression is very unfortunate. We wanted to express, that the modeled variances at the cave locations are very similar globally. However, as you state, this is not visible from Fig.5. We will leave out this reference in a revised version and add more information to the "smoothed model pattern."

*Figure caption 6: 'the simulated  $\delta^{18}O_{pw}$  but down-sampled to the same temporal resolution as in (a) with 3 year filter. 'Just to be sure, as it is not written somewhere: You first applied the three year filter and then did the down sampling, correct?'*

This is a good point. So far the 3-year filter was applied after the degradation of the sampling resolution. We will explore to what extent applying the filter first changes the results in the revision process and ensure that this is better described in the methods section.

L332: *'We find 18, 15 and 22 significant correlations from 87 entities. . . ': Out of curiosity, are the records/sites within those observed significant correlations in the three model runs always the same or are they varying? I mean if for example a record from one cave is significant for one run is the same cave record as well significant for the other simulations?'*

Thank you for this attentive question. Indeed, from the total 55 significant correlations that we find for the three ensemble temperatures here, only half come from the same 12 entities, which again indicates at a very low signal to noise ratio in speleothems. We will add this, also for simulated precipitation and  $\delta^{18}O$  , and include it in the discussion.

*Figure caption 8: indicates instead of indicat.*  
Done.

*Figure caption 9: gridboxes instead of gridboxe*  
Done.

L385: *'spatial pattern for the offsets were not distinguishable.'* I would slightly disagree here. Isn't it the case that in warmer climates the offset is more negative than in colder climates? See fig. 4d. You even described the low to high latitude trend in the northern hemisphere by yourself in lines 249-250.

Thank you, we changed the section as follows:

”...Measured  $\delta^{18}O_{dw.eq}$  followed general isotopic signature patterns as described by Dansgaard (1964). **The offsets are more positive in the extratropics of the Northern Hemisphere, which is also shown by their temperature dependency (Fig.4).**”

L388: ‘They find a stronger influence of seasonality of precipitation in warmer climates, highlighting the importance of a karst recharge model’ Wouldn’t it highlight the fact, that the model d18O values should be calculated as a precipitation weighted mean? Or even as infiltration weighted mean?

See major comment section.

L389-390: ‘observed a strong temperature dependency reflected in the offset and  $\delta^{18}O_{dw.eq}$  over the last Millennium, showing the influence of fractionation . . .’: You claimed, that you accounted for the temperature-dependent isotope fractionation during  $CaCO_3$  precipitation to calculate the d18O if the drip-water equivalent. So I think, this reason can be safely excluded.

I would evaluate it more likely that, as evaporation scales with temperature, the d18O values of precipitation have been changed by this process before the water even enters the epikarst zone. Thus, I would like to highlight it again (sorry for repeating myself), that using some infiltration weighted d18O mean is probably a better choice.

Thank you for this clarification. We changed the section as follows:

”...Here, we also observed a strong temperature dependency reflected in the offset and  $\delta^{18}O_{dw.eq}$  over the last millennium, showing the influence of cave internal processes on the  $\delta^{18}O$  in drip water (Fig. 4) **but also additional fractionation processes or weighting through evaporation before the precipitated water enters the epikarst.** The higher offsets on the Northern Hemisphere possibly indicate a stronger influence of the continental effect. Still, from the records alone and with no karst-recharge **or evaporation** information, we were not able to distinguish specific climatic control regions. This requires a more thorough analysis including monitoring data **as well as more simulated variables.** ...”

L410-411: ‘However, we find little regional consistency and high heterogeneity in the variance estimates from the speleothem records’. While there is indeed some high heterogeneity in the variance, I wonder, if this could be an argument for a strong influence of cave internal processes? That is a tricky one.

Later you discuss the correlation pattern, and this seems quite convincing that changes happen in the same direction and at about the same time at least at regional scale. Only the magnitude seems to change - as derived from the variance analysis. Wouldn’t this rather mean, that each cave/stalagmite strengthen or weaken the initial climate signal, but that it

is still contained? As you said, this alteration could happen by soil/karst/cave processes. This way, one could argue about the magnitude of the changes, but not about the variation itself. How do you think about this?

Thank you for this interesting thought. As discussed for Fig 9, we do find generally positive correlation estimates between entities within one cave, showing local consistency as you describe. However, this is not true for all caves. A more thorough analysis might be needed to systematically discuss this relationship, and also a larger global sample size of caves with multiple speleothems. Even though the SISALv2 database provides a very large dataset, for the last millennium only 12 caves exhibit multiple entities, that fit our analysis criteria. We will include a section on this in the discussion following L410-411, including your thoughts from above.

Also we change the section from L410 as follows:

These findings point to the influence of cave internal **and karst processes on meteoric  $\delta^{18}O$**  or the impact of seasonally filtered data captured by speleothems, which is in agreement with McDermott et al. (2001).

*L416-417: 'Studies observing transit time in karst systems find increases in drip rate after an increase in precipitation e.g. after days (Riechelmann et al., 2011).' I suggest to term this Riechelmann et al., (2011) work rather as a study, which investigates the cave reaction time to precipitation events - not a transit time study. And the cave reaction on heavy rain events is often fast (as observed in other caves as well), but it will not change the transfer time (too much). The residence time can only be found by tritium or other appropriate tracer isotopes (as you correctly describe below.)*

Thank you for suggesting this more precise term. We will replace "transit time" with "cave reaction time" in this sentence in the revised version.

*L442: I guess, cave monitoring would not only help to compare two caves but also to improve the comparability between a cave and climate model results. You could add this as well. Furthermore, I think that not only monitoring would help, but that (model-based) weighted infiltration values would also help (as written already earlier). Even with your sentence in line 438 you imply so by yourself.*

We changed the section as follows: "...Further dripwater monitoring studies **combined with a comparison to model data output would help to** characterize the seasonality of individual caves **and would, therefore, lead to deeper** understanding of which climatic signal is captured by speleothems and enhance comparability between different caves...."

*L455: 'but could also be influenced by non-climatic overprints on the  $\delta^{18}O$  signal up to*

the centennial scale.’ I would argue, that nearly all changes in the processes in the cave are climate driven. Unfortunately, sometimes they counter the pure climate imprint and on other locations they amplify it.

Thanks for pointing this out. With non-climatic, we meant to say environmental overprints such as changes in the epikarst which may result in different growth rates, that have not directly climate driven. We change the section as follows:

”...In part, this can be due to heterogeneous temporal resolution, but could also be influenced by non-climatic **environmental** overprints on the  $\delta^{18}O$  signal up to the centennial scale. ...”

L476: *’as a bias of 1C in the simulated temperature would account for a change in  $\delta^{18}O_{dw.eq}$  of approximately 2‰’ If you really take the  $\delta^{18}O$ -T relationship of Tremaine (or any similar) this statement appears to be wrong. Fractionation during  $CaCO_3$  precipitation is T-dependent by  $\sim 0.25$  permil per  $^{\circ}C$ . So this would mean an offset of 1 permil, if the modeled T is wrong by 4  $^{\circ}C$ . I guess this would only be the case in mountainous regions, were the orography of the model is not close enough to the true altitude of the cave. You mentioned some examples earlier in your manuscript.*

L477: *’A bias of 1‰ in the  $\delta^{18}O_{dw.eq}$  however, accounts for a temperature change of 0.1\_C for the lowest simulated annual mean cave temperature (3.1\_C in Norway), and a change of 13.1\_C for the highest simulated annual mean cave temperature (32.5\_C in the tropics).’ This puzzles me now quite a lot. You said in your earlier sentence, that 1  $^{\circ}C$  is 2 permil. This does not fit with your statement in this sentence. Maybe, you mean something different?*

Apologies for the inconsistency. We have checked the calculation. The corrected numbers do not change our interpretation. We will clarify the calculation in the manuscript and change the numbers in this section as follows:

”...Knowing the actual temperature history of the caves better could strongly reduce the uncertainty, as a bias of  $\Delta 1^{\circ}C$  in the simulated temperature would account for a change in  $\delta^{18}O_{dw.eq}$  of approximately  $\Delta 0.2\text{‰}$ . A bias of  $\Delta 1\text{‰}$  in the  $\delta^{18}O_{dw.eq}$  however, accounts for a temperature change of  $4.5^{\circ}C$  for the lowest simulated annual mean cave temperature ( $3.1^{\circ}C$  in Norway), and a change of  $5.5^{\circ}C$  for the highest simulated annual mean cave temperature ( $32.5^{\circ}C$  in the tropics). ...”

## References

- Breitenbach, S. F., Rehfeld, K., Goswami, B., Baldini, J. U., Ridley, H. E., Kennett, D. J., Prufer, K. M., Aquino, V. V., Asmerom, Y., Polyak, V. J., Cheng, H., Kurths, J., and Marwan, N.: Constructing proxy records from age models (COPRA), *Climate of the Past*, 8, 1765–1779, <https://doi.org/10.5194/cp-8-1765-2012>, 2012.
- Dansgaard, W.: Stable isotopes in precipitation, *Tellus*, 16, 436–468, <https://doi.org/10.3402/tellusa.v16i4.8993>, 1964.
- Dee, S., Emile-Geay, J., Evans, M. N., Allam, A., Steig, E. J., and Thompson, D. M.: PRYSM: An open-source framework for PROXY System Modeling, with applications to oxygen-isotope systems, *Journal of Advances in Modeling Earth Systems*, 7, 1220–1247, <https://doi.org/10.1002/2015MS000447>, 2015.
- Dreybrodt, W. and Scholz, D.: Climatic dependence of stable carbon and oxygen isotope signals recorded in speleothems: From soil water to speleothem calcite, *Geochimica et Cosmochimica Acta*, 75, 734 – 752, <https://doi.org/10.1016/j.gca.2010.11.002>, URL <http://www.sciencedirect.com/science/article/pii/S0016703710006277>, 2011.
- Fairchild, I. J., Smith, C. L., Baker, A., Fuller, L., Spötl, C., Matthey, D., and McDermott, F.: Modification and preservation of environmental signals in speleothems, *Earth-Science Reviews*, 75, 105–153, <https://doi.org/10.1016/j.earscirev.2005.08.003>, 2006.
- Haude, W.: Zur praktischen Bestimmung aktuellen und potentiellen Evaporation und Evapotranspiration, *Mitteilungen des Deutschen Wetterdienstes*, Band 1, 1954.
- Jean-Baptiste, P., Genty, D., Fourné, E., and Régnier, E.: Tritium dating of dripwater from Villars Cave (SW-France), *Applied Geochemistry*, 107, 152–158, <https://doi.org/10.1016/j.apgeochem.2019.06.005>, 2019.
- McDermott, F., Matthey, D. P., and Hawkesworth, C.: Centennial-scale holocene climate variability revealed by a high-resolution speleothem  $\delta^{18}\text{O}$  record from SW Ireland, *Science*, 294, 1328–1331, <https://doi.org/10.1126/science.1063678>, 2001.
- Rehfeld, K. and Kurths, J.: Similarity estimators for irregular and age-uncertain time series, *Climate of the Past*, pp. 107–122, <https://doi.org/10.5194/cp-10-107-2014>, 2014.
- Thornthwaite, C. W. and Mather, J. R.: Instructions and tables for computing potential evapotranspiration and the water balance, Tech. rep., Centerton, 1957.
- Tremaine, D. M., Froelich, P. N., and Wang, Y.: Speleothem calcite formed in situ: Modern calibration of  $\delta^{18}\text{O}$  and  $\delta^{13}\text{C}$  paleoclimate proxies in a continuously-monitored natural

cave system, *Geochimica et Cosmochimica Acta*, <https://doi.org/10.1016/j.gca.2011.06.005>, 2011.

Wackerbarth, A., Scholz, D., Fohlmeister, J., and Mangini, A.: Modelling the delta 18 O value of cave drip water and speleothem calcite, *Earth and Planetary Science Letters*, 299, 387–397, <https://doi.org/10.1016/j.epsl.2010.09.019>, 2010.
